# Supplementary material
Source: ML conference proceedings conference paper supplement (https://proceedings.mlr.press/v48/tremblay16.html)
Supplement: Supplementary file [file tremblay16-supp.pdf]

## Supplementary material for Compressive Spectral Clustering

### A. Proof of Theorem 3.2

*Proof.* Note that  $H_{\lambda_k} = U_k U_k^T$ , and that  $Y_k = V_k U_k$ . We rewrite  $\|\tilde{\mathbf{f}}_i - \tilde{\mathbf{f}}_j\|$  in a form that will let us apply the Johnson-Lindenstrauss lemma of norm conservation:

$$\begin{aligned} \|\tilde{\mathbf{f}}_i - \tilde{\mathbf{f}}_j\| &= \|\mathbf{R}^T H_{\lambda_k}^T V_k^T (\boldsymbol{\delta}_i - \boldsymbol{\delta}_j)\| \\ &= \|\mathbf{R}^T U_k U_k^T V_k^T (\boldsymbol{\delta}_i - \boldsymbol{\delta}_j)\| \\ &= \|\mathbf{R}^T U_k (\mathbf{f}_i - \mathbf{f}_j)\| \end{aligned} \quad (1)$$

where the  $\mathbf{f}_i$  are the standard SC feature vectors. Applying Theorem 1.1 of (Achlioptas, 2003) (an instance of the Johnson-Lindenstrauss lemma) to  $\|\mathbf{R}^T U_k (\mathbf{f}_i - \mathbf{f}_j)\|$ , the following holds. If  $d$  is larger than:

$$\frac{4 + 2\beta}{\epsilon^2/2 - \epsilon^3/3} \log N, \quad (2)$$

then with probability at least  $1 - N^{-\beta}$ , we have,  $\forall (i, j) \in \{1, \dots, N\}^2$ :

$$(1 - \epsilon) \|U_k (\mathbf{f}_i - \mathbf{f}_j)\| \leq \tilde{D}_{ij} \leq (1 + \epsilon) \|U_k (\mathbf{f}_i - \mathbf{f}_j)\|.$$

As the columns of  $U_k$  are orthonormal, we end the proof:

$$\forall (i, j) \in [1, N]^2 \quad \|U_k (\mathbf{f}_i - \mathbf{f}_j)\| = \|\mathbf{f}_i - \mathbf{f}_j\| = D_{ij}.$$

□

### B. Proof of Theorem 4.1

*Proof.* Recall that:  $\tilde{D}_{ij}^r := \|\tilde{\mathbf{f}}_{\omega_i} - \tilde{\mathbf{f}}_{\omega_j}\| = \|\mathbf{R}^T \tilde{H}_{\lambda_k}^T V_k^T \mathbf{M}^T \boldsymbol{\delta}_{ij}^r\|$ , where  $\boldsymbol{\delta}_{ij}^r = \boldsymbol{\delta}_i^r - \boldsymbol{\delta}_j^r$ . Given that  $\tilde{H}_{\lambda_k} = H_{\lambda_k} + E$  and using the triangle inequality in the definition of  $\tilde{D}_{ij}^r$ , we obtain

$$\begin{aligned} &\|\mathbf{R}^T H_{\lambda_k}^T V_k^T \mathbf{M}^T \boldsymbol{\delta}_{ij}^r\| - \\ &\|\mathbf{R}^T E^T V_k^T \mathbf{M}^T \boldsymbol{\delta}_{ij}^r\| \leq \tilde{D}_{ij}^r \leq \|\mathbf{R}^T E^T V_k^T \mathbf{M}^T \boldsymbol{\delta}_{ij}^r\| + \\ &\|\mathbf{R}^T H_{\lambda_k}^T V_k^T \mathbf{M}^T \boldsymbol{\delta}_{ij}^r\|, \end{aligned} \quad (3)$$

We continue the proof by bounding  $\|\mathbf{R}^T H_{\lambda_k}^T V_k^T \mathbf{M}^T \boldsymbol{\delta}_{ij}^r\|$  and  $\|\mathbf{R}^T E^T V_k^T \mathbf{M}^T \boldsymbol{\delta}_{ij}^r\|$  separately.

Let  $\delta \in ]0, 1]$ . To bound  $\|\mathbf{R}^T H_{\lambda_k}^T V_k^T \mathbf{M}^T \boldsymbol{\delta}_{ij}^r\|$ , we set  $\epsilon = \delta/2$  in Theorem 3.2. This proves that if  $d$  is larger than

$$d_0 = \frac{16(2 + \beta)}{\delta^2 - \delta^3/3} \log n,$$

then with probability at least  $1 - n^{-\beta}$ ,

$$\left(1 - \frac{\delta}{2}\right) D_{ij}^r \leq \|\mathbf{R}^T H_{\lambda_k}^T V_k^T \mathbf{M}^T \boldsymbol{\delta}_{ij}^r\| \leq \left(1 + \frac{\delta}{2}\right) D_{ij}^r,$$

for all  $(i, j) \in \{1, \dots, n\}^2$ . To bound  $\|\mathbf{R}^T E^T V_k^T \mathbf{M}^T \boldsymbol{\delta}_{ij}^r\|$ , we use Theorem 1.1 in (Achlioptas, 2003). This theorem proves that if  $d > d_0$ , then with probability at least  $1 - n^{-\beta}$ ,

$$\|\mathbf{R}^T E^T V_k^T \mathbf{M}^T \boldsymbol{\delta}_{ij}^r\| \leq \left(1 + \frac{\delta}{2}\right) \|E^T V_k^T \mathbf{M}^T \boldsymbol{\delta}_{ij}^r\|,$$

for all  $(i, j) \in \{1, \dots, n\}^2$ . Using the union bound and (3), we deduce that, with probability at least  $1 - 2n^{-\beta}$ ,

$$\begin{aligned} \left(1 - \frac{\delta}{2}\right) D_{ij}^r - \left(1 + \frac{\delta}{2}\right) \|E^T V_k^T \mathbf{M}^T \boldsymbol{\delta}_{ij}^r\| \\ \leq \tilde{D}_{ij}^r \leq \left(1 + \frac{\delta}{2}\right) \|E^T V_k^T \mathbf{M}^T \boldsymbol{\delta}_{ij}^r\| + \left(1 + \frac{\delta}{2}\right) D_{ij}^r, \end{aligned} \quad (4)$$

for all  $(i, j) \in \{1, \dots, n\}^2$  provided that  $d > d_0$ .

Then, as  $e$  is bounded by  $e_1$  on the first  $k$  eigenvalues of the spectrum and by  $e_2$  on the remaining ones, we have

$$\begin{aligned} \|E^T V_k^T \mathbf{M}^T \boldsymbol{\delta}_{ij}^r\|^2 &= \|U e(\Lambda) U^T V_k^T \mathbf{M}^T \boldsymbol{\delta}_{ij}^r\|^2 \\ &= \|e(\Lambda) U^T V_k^T \mathbf{M}^T \boldsymbol{\delta}_{ij}^r\|^2 \\ &= \sum_{l=1}^N e(\lambda_l)^2 |(M V_k \mathbf{u}_l)^T \boldsymbol{\delta}_{ij}^r|^2 \\ &\leq e_1^2 \sum_{l=1}^k |(M V_k \mathbf{u}_l)^T \boldsymbol{\delta}_{ij}^r|^2 \\ &\quad + e_2^2 \sum_{l=k+1}^N |(M V_k \mathbf{u}_l)^T \boldsymbol{\delta}_{ij}^r|^2 \\ &= e_1^2 \|U_1^T V_k^T \mathbf{M}^T \boldsymbol{\delta}_{ij}^r\|^2 \\ &\quad + e_2^2 \left( \|U^T V_k^T \mathbf{M}^T \boldsymbol{\delta}_{ij}^r\|^2 - \|U_1^T V_k^T \mathbf{M}^T \boldsymbol{\delta}_{ij}^r\|^2 \right) \\ &= (e_1^2 - e_2^2) \|U_1^T V_k^T \mathbf{M}^T \boldsymbol{\delta}_{ij}^r\|^2 \\ &\quad + e_2^2 \|U^T V_k^T \mathbf{M}^T \boldsymbol{\delta}_{ij}^r\|^2 \\ &= (e_1^2 - e_2^2) (D_{ij}^r)^2 + e_2^2 \|V_k^T \mathbf{M}^T \boldsymbol{\delta}_{ij}^r\|^2 \\ &\leq (e_1^2 - e_2^2) (D_{ij}^r)^2 + \frac{2e_2^2}{\min_i \{v_k(i)^2\}}. \end{aligned}$$

055  
056  
057  
058  
059  
060  
061  
062  
063  
064  
065  
066  
067  
068  
069  
070  
071  
072  
073  
074  
075  
076  
077  
078  
079  
080  
081  
082  
083  
084  
085  
086  
087  
088  
089  
090  
091  
092  
093  
094  
095  
096  
097  
098  
099  
100  
101  
102  
103  
104  
105  
106  
107  
108  
109

The last step follows from the fact that

$$\begin{aligned} \|\mathbf{V}_k^T \mathbf{M}^T \boldsymbol{\delta}_{ij}^r\|^2 &= \sum_{l=1}^N \frac{1}{v_k(l)^2} |(\mathbf{M}^T \boldsymbol{\delta}_{ij}^r)(l)|^2 \\ &= \frac{1}{v_k(\omega_i)^2} + \frac{1}{v_k(\omega_j)^2} \leq \frac{2}{\min_i \{v_k(i)\}^2} \end{aligned}$$

Define, for all  $(i, j) \in \{1, \dots, n\}^2$ :

$$e_{ij} := \sqrt{|e_1^2 - e_2^2|} D_{ij}^r + \frac{\sqrt{2}e_2}{\min_i \{v_k(i)\}}.$$

Thus, the above inequality may be rewritten as:

$$\|\mathbf{E}^T \mathbf{V}_k^T \mathbf{M}^T \boldsymbol{\delta}_{ij}^r\| \leq e_{ij},$$

for all  $(i, j) \in \{1, \dots, n\}^2$ , which combined with (4) yields

$$\begin{aligned} \left(1 - \frac{\delta}{2}\right) D_{ij}^r - \left(1 + \frac{\delta}{2}\right) e_{ij} \\ \leq \tilde{D}_{ij}^r \leq \left(1 + \frac{\delta}{2}\right) e_{ij} + \left(1 + \frac{\delta}{2}\right) D_{ij}^r, \end{aligned} \quad (5)$$

for all  $(i, j) \in \{1, \dots, n\}^2$ , with probability at least  $1 - 2n^{-\beta}$  provided that  $d > d_0$ .

Let us now separate two cases. In the case where  $D_{ij}^r \geq D_{min}^r > 0$ , we have

$$\begin{aligned} e_{ij} &= \frac{e_{ij}}{D_{ij}^r} D_{ij}^r = \left( \sqrt{|e_1^2 - e_2^2|} + \frac{\sqrt{2}e_2}{D_{ij}^r \min_i \{v_k(i)\}} \right) D_{ij}^r \\ &\leq \left( \sqrt{|e_1^2 - e_2^2|} + \frac{\sqrt{2}e_2}{D_{min}^r \min_i \{v_k(i)\}} \right) D_{ij}^r \\ &\leq \frac{\delta}{2 + \delta} D_{ij}^r. \end{aligned}$$

provided that Eq. (7) of the main paper holds. Combining the last inequality with (5) proves the first part of the theorem.

In the case where  $D_{ij}^r < D_{min}^r$ , we have

$$e_{ij} < \sqrt{|e_1^2 - e_2^2|} D_{min}^r + \frac{\sqrt{2}e_2}{\min_i \{v_k(i)\}} \leq \frac{\delta}{2 + \delta} D_{min}^r.$$

provided that Eq. (7) of the main paper holds. Combining the last inequality with (5) terminates the proof.  $\square$

### C. Experiments on the SBM with heterogeneous community sizes

We perform experiments on a SBM with  $N = 10^3$ ,  $k = 20$ ,  $s = 16$  and heterogeneous community sizes. More

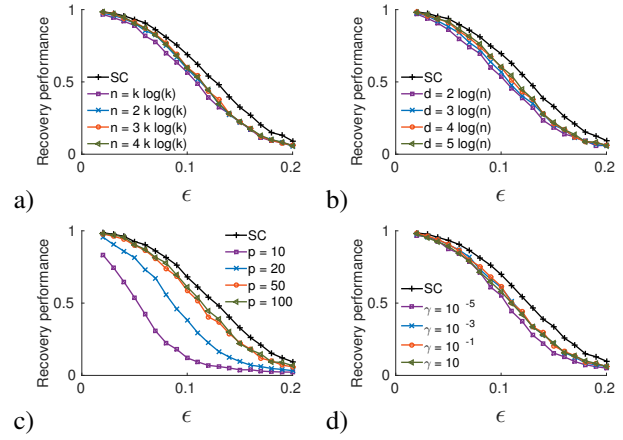

Figure 1. (a-d): recovery performance of CSC on a SBM with  $N = 10^3$ ,  $k = 20$ ,  $s = 16$  and heterogeneous community sizes versus  $\epsilon$ , for different  $n$ ,  $d$ ,  $p$ ,  $\gamma$ . Default is  $n = 2k \log k$ ,  $d = 4 \log n$ ,  $p = 50$  and  $\gamma = 10^{-3}$ . All results are averaged over 20 graph realisations.

specifically, the list of community sizes is chosen to be: 5, 10, 15, 20, 25, 30, 35, 40, 45, 50, 55, 60, 65, 70, 75, 80, 85, 90 and 95 nodes. In this scenario, there is no theoretical value of  $\epsilon$  over which it is proven that recovery is impossible in the large  $N$  limit. Instead, we vary  $\epsilon$  between 0 and 0.2 and show the recovery performance results with respect to  $n$ ,  $d$ ,  $p$  and  $\gamma$  in Fig. 1. Results are similar to the homogeneous case presented in Fig. 1(a-d) of the main paper.

### References

Achlioptas, D. Database-friendly random projections: Johnson-lindenstrauss with binary coins. *Journal of Computer and System Sciences*, 66(4):671 – 687, 2003.
